# Parameter Identifiability and Non-Uniqueness In Connectome Based Neural Mass Models

X. Xie<sup>a,\*</sup>, A. Kuceyeski<sup>a</sup>, S.A. Shah<sup>a</sup>, N.D. Schiff<sup>a</sup>, S.S. Nagarajan<sup>b</sup>, A.  
Raj<sup>a,b</sup>

<sup>a</sup>*The Brain and Mind Research Institute, Weill Cornell Medicine, New York City, NY,  
United States of America*

<sup>b</sup>*Department of Radiology and Bioengineering, University of California San Francisco,  
San Francisco, CA, United States of America*

---

## Abstract

The spatial-temporal patterns of neuronal dynamics emerge from the network of coordinated brain regions, this structure-function relationship of the brain can be described mathematically by biophysical models of coupled brain regions connected by white matter tractography. Implementations of such models have focused on reproducing functional connectivity extracted from functional magnetic resonance imaging (fMRI), but these efforts are limited by the temporal resolution of fMRI data and the reduction of time course recordings into phenomenological functional connectivity maps. Here, we optimize parameters of a neural mass model (NMM) to best fit region-wise power spectra across the whole brain estimated from source localized electroencephalography (EEG). NMM models with global parameters were not able to fully reproduce region-wise power spectra, with or without the inclusion of structural connectivity information. In contrast, without the inclusion of structural connectivity information, independent oscillators at each brain region are able to reproduce region-wise power spectra. But the addition of structural connectivity and transmission delays to the NMM does not improve overall power spectra fit. Connectome-based NMM implementations with regional parameters lead to high dimensional network models that produce non-unique results. Inherent parameter identifiability problem in network models poses challenges for using such models as diagnostic tools

---

\*Corresponding author

*Email address:* xix2007@med.cornell.edu (X. Xie)

for neurological diseases.

*Keywords:* Identifiability, Neural Mass Model, Parameter Inference, Connectome, Power Spectrum

---

## 1. Introduction

Neuronal populations in the brain are continuously active whether they are engaged in behavior or at rest, and it is evident that functional activity produced by interacting neuronal populations is a product of specific neuronal properties as well as connection strength amongst themselves [32, 44, 7, 40]. One powerful approach to mathematically describe this structure-function relationship is the simulation of neural mass models (NMMs). This approach models the average activity with a small number of parameters to summarize the behavior of a neural ensemble [31, 39, 56, 8]. A neural ensemble is a set of locally interacting neurons [16], and the properties of these neurons can be described in terms of their mean firing rate and mean membrane potentials, therefore a NMM can represent the lumped activity of a specific neuronal cell type or a particular functional brain region [49, 50]. By coupling several such lumped neural masses via structural connectivity and transmission delay, these models are capable of producing functional connectivity in both healthy [18, 32, 5] and disease [53, 6, 51].

Previous macroscopic network models of brain dynamics relied on the spatial resolution of fMRI signals [4, 17] or encephalography data [11, 14] in source space to identify functionally related brain regions and evaluated model performance based on band-limited functional connectivity (FC) metrics. FC metrics are a statistical map of correlated interactions between brain areas, this phenomenological metric is not sufficient to fully explain the temporal dynamics between brain regions [9]. Thus, theoretical models limited to reproducing selective FC metrics are under-utilized and do not fully address the structure-function relationship of the brain. However, fMRI data is limited by its temporal resolution and can only contain signals in the low frequency bands, does not capture neural oscillatory frequencies observable in electrophysiological recordings like electrocorticography (ECoG), magnetoencephalography (MEG), and EEG.

The observable alpha, beta, gamma, delta and theta rhythms follow a spatially distributed pattern [3, 22, 33, 37, 35]. For example, the alpha range is distinctively shown in the occipital lobe and posterior temporal cortex

33 [25, 46, 41, 43]. These heterogeneous patterns of the observable power spectra  
34 are produced by a combination of local oscillatory behavior at brain regions  
35 and varying degrees of connectivity between distant brain regions. Previous  
36 works in modeling structure-function relationships have mostly assumed the  
37 same local properties across the network to reproduce fMRI functional con-  
38 nectivity patterns [9, 20, 57], but exploring the frequency profiles for each  
39 brain region using such a simplistic approach has not been explored. While  
40 it is encouraging that oscillator models are capable of displaying expected  
41 frequency behavior [8, 49, 50, 54] and can reproduce functional connectivity  
42 to a limited extent [10, 45, 47], the addition of SC and transmission delay to  
43 local parameters in a network model has not been explored in terms of how  
44 well they can predict regional power spectra.

45 Here, we first implemented a Wilson-Cowan oscillator NMM with or with-  
46 out SC. We estimated the source localized EEG power spectra and then op-  
47 timized model parameters of variants of our NMM to fit the regional power  
48 spectra estimates. We implement three variations of the Wilson-Cowan Os-  
49 cillator model as illustrated in Figure 1; 1) varying oscillators (VO) at each  
50 brain region without structural connectivity to check if the model is able  
51 to simulate power spectra across all brain regions without SC; 2) identical  
52 oscillators at each brain region with structural connectivity (IOC) to observe  
53 model fitting with SC but without any variations in local circuitry; 3) varying  
54 oscillators at each brain region with structural connectivity (VOC) to fit em-  
55 pirical source localized EEG power spectra with both SC and local circuitry  
56 variation. The resulting optimized models show local parameter variations is  
57 needed to generate spatially varying patterns of power spectra, furthermore,  
58 the addition of SC and global parameters in higher dimensional models did  
59 not improve model fitting to observed EEG spectra.

60 These high dimensional models require inference of a high number of  
61 parameters. Accurate inference of the model parameters in a complex net-  
62 work of interacting brain regions is incredibly difficult for any optimization  
63 method. Consequently, the over-specification of such models may result in  
64 non-unique solutions. Indeed, we find that higher dimensional connectome  
65 coupled NMMs are not able to provide uniquely identifiable solutions to the  
66 parameter inference problem. This poses a challenge for the emerging idea  
67 of using inferred model parameters as diagnostic biomarkers of neurological  
68 diseases[43, 13, 26, 48].

## 69 2. Methods

### 70 2.1. Subjects and Data Collection

71 All experiments were conducted after obtaining written informed consent  
72 from the subjects and approval by The Institutional Review Board of Weill  
73 Cornell Medical College. T1-weighted anatomical MRI and diffusion-MRI  
74 scans were collected from 11 out of the 13 healthy individuals (8 male, 35.2  
75 +/- 12.25 years) on a 3.0 Tesla General Electric Signa Excite HDx (GE  
76 Healthcare, Waukesha, WI) clinical MRI system with an eight-channel head  
77 receive-only coil. DMRI scans were obtained using a spin-echo diffusion ten-  
78 sor pulse sequence with one T2-weighted image, 33 diffusion-weighted images  
79 (one subject is an exception with 55 directions) evenly distributed on a sphere  
80 with  $b = 1000$  s/mm<sup>2</sup>, TE = 76.7 ms, TR = 9000 ms, field of view = 22 cm,  
81 28 slices of 5.0 mm thickness, matrix size = 128 x 128, reconstructed with  
82 zero filling to 256 x 256. An axial 3D IR-prepped, fast SPGR with param-  
83 eters tuned to optimize brain tissue contrast sequence (BRAVO sequence) was  
84 used for anatomical imaging with inversion time = 400 ms, TR = 8.9 ms, TE  
85 = 3.5 ms, flip angle = 13 degrees, axial field of view = 24 cm, 136 slices of 1.2  
86 mm thickness, matrix size = 256 x 256, parallel imaging acceleration factor  
87 = 2. Additionally, eyes-open (EO) and eyes-closed (EC) Resting-state EEG  
88 data was collected for 9 out of the 13 healthy subjects. Recordings for a min-  
89 imum of 110 seconds were performed with a 129-channel HydroCel Geodesic  
90 EEG Sensor Net (Electrical Geodesics, Eugene, Oregon). The impedance of  
91 all electrodes was  $< 75k\Omega$  at the beginning of the recording, the EEG signals  
92 were sampled at 250 Hz sampling frequency and filtered from DC to 100Hz.  
93 Datasets were chosen for analysis only if all data modalities were present  
94 without unacceptable levels of noise or artifacts. Only 7 subjects had com-  
95 plete sets of usable EEG, MRI, and DTI data, so we proceeded with analyses  
96 using only those subjects.

### 97 2.2. Structural Connectivity Networks

98 Structural and diffusion MR volumes were co-registered and pre-processed  
99 in the manner previously described [29]. Segmentation of gray matter, white  
100 matter, and cerebrospinal fluid was performed after slice-timing correction,  
101 realignment, co-registration and/or normalization, and spatial smoothing  
102 was performed using SPM8 (Statistical Parametric Mapping tool). The gray  
103 matter was further parcellated into 86 anatomical regions of interest (ROIs)  
104 based on the Desikan-Killany atlas using the established FreeSurfer package

105 [15]. The parcellated regions were used to seed tractography nodes in co-  
106 registered diffusion MRI volumes. The connectivity between any two regions  
107 was given by a weighted sum of tracts going between them as described by  
108 [23]. The algorithm traces likely white matter fiber tracts by taking into  
109 account tissue probability maps as well as diffusion orientation in a Bayesian  
110 manner, the tracing stopped when the track angle between steps exceeded  
111  $\pi/3$  or when encountering a voxel that is outside of the white matter mask.

### 112 2.3. Source Localization

113 Source localization of the EEG signals was performed with Brainstorm  
114 [52], which is documented and freely available for download online under the  
115 GNU general public license (<http://neuroimage.usc.edu/brainstorm>). Prior  
116 to source localization, the raw EEG data were band-pass filtered between 2  
117 and 45 Hz, transience time segments and unusable channels were manually  
118 removed after inspecting the time series and its power spectrum. We then  
119 applied an average reference followed by independent component analysis to  
120 remove artifacts such as eye blinks and heart beats that are picked up by the  
121 EEG electrodes, removal of additional noisy time segments was performed  
122 manually after inspection.

123 Source localization was performed with a "warped" Colin27 template  
124 head model to remove variations due to noise level, head position, and  
125 starting/ending slices for MRI acquisition runs. The Colin27 template is a  
126 stereotaxic average of 27 T1-weighted MRI scans of a single individuals head  
127 [19]. To incorporate individual subject's anatomical information, we created  
128 pseudo-individual anatomies using Brainstorm's warp anatomy functions to  
129 deform and scale the high resolution Colin27 head shapes to match each sub-  
130 ject's individual head shapes. Surface meshes of the brain, skull, and scalp  
131 were extracted from the template MRIs using 1922 vertices per layer. To  
132 obtain an analytical approximation of the lead field for the conductive brain  
133 volume, we chose to use the three-shell spherical harmonics expansion meth-  
134 ods as discussed by [38]. Specifically, an initial grid of 4000 source points  
135 was generated from the cortex surface and samples the brain volume in an  
136 adaptive manner towards the center of the brain, each grid layer is down-  
137 sampled by a factor of 3 for a maximum of 17 layers, resulting in a total  
138 of 11151 to 16442 dipole sources depending on individual head anatomy. A  
139 representative visualization of the dipole sources is shown in Fig. S1.

140 To obtain the inverse solution, a noise covariance matrix was calculated  
141 over the EEG recordings to model the noise contaminating our data; only

142 the diagonal elements were kept for the inverse solution to estimate the vari-  
 143 ance of each sensor. For all subjects, the activity at each dipole source  
 144 was estimated using a linearly constrained minimum variance (LCMV) spa-  
 145 tial filter [55]. Three-dimensional dipole sources yielded a 4D time series  
 146 ( $x \times y \times z \times time$ ) for each set of EEG recordings. The norm of the 3 spatial  
 147 coordinates ( $\sqrt{x^2 + y^2 + z^2}$ ) at each time point was taken to produce a 1D  
 148 time series of estimated activation over the entire dipole. An average time  
 149 series was obtained for all sources belonging to each of the same 86 ROIs  
 150 as defined previously (See Fig. S1 for visualization of the dipoles), and the  
 151 source localized time series were used as empirical data for modeling training.

#### 152 2.4. Wilson & Cowan Neural Mass Model

153 To model neurophysiological activity from anatomical architecture for  
 154 each ROI, we adopt the Wilson-Cowan coupled oscillators [56]. This model  
 155 assumes that a local circuit consists of two lumped masses of excitatory  
 156 and inhibitory neural populations interacting with each other, whole brain  
 157 regional dynamics are achieved by coupling local masses via structural con-  
 158 nectivity  $A_{jk}$ , global coupling parameter  $c_5$ , and a transmission delay  $\tau_d^{k,j}$ .  
 159 The simulated average activity at the  $j^{th}$  brain region is:

$$\tau_e \frac{dE_j}{dt} = -E_j(t) + (S_{e_{max}} - E_j(t))S_e(c_1 E_j(t) - c_2 I_j(t) + c_5 \sum_k A_{jk} E_k(t - \tau_d^{k,j}) + P_j(t)) + \sigma w_j(t) \quad (1)$$

$$\tau_i \frac{dI_j}{dt} = -I_j(t) + (S_{i_{max}} - I_j(t))S_i(c_3 E_j(t) - c_4 I_j(t)) + \sigma v_j(t) \quad (2)$$

160 Where  $E(t)$  and  $I(t)$  represent the firing rate of the excitatory and in-  
 161 hibitory neuronal populations respectively,  $\tau$  is a time constant and  $w_j(t)$  and  
 162  $v_j(t)$  are random normally distributed noise with standard deviation  $\sigma$ .  $P(t)$   
 163 is an external input parameter to the excitatory neural ensemble that controls  
 164 oscillatory activity, local parameters  $c_1$ ,  $c_2$ ,  $c_3$ , and  $c_4$  represent the average  
 165 number of excitatory and inhibitory synapses within a neuronal ensemble.  
 166  $S_e$  and  $S_i$  are transfer functions characterized by the sigmoidal function cap-  
 167 turing the non-linear response of a cell generating an action potential based  
 168 on summed synaptic input:

$$S_i^\varepsilon(x) = \frac{1}{1 + e^{-a_i^\varepsilon(x - \theta_i^\varepsilon)}} - \frac{1}{1 + e^{a_i^\varepsilon \theta_i^\varepsilon}} \quad (3)$$

169 Different variations of this model (Fig. 1) can simulate average neuronal  
 170 activity at each region in the brain. Here, we will compare three models  
 171 (1) the varying oscillator (VO) model that consists of varying local neuronal  
 172 ensemble with only locally defined parameters and no inter-connectivity be-  
 173 tween nodes, (2) the varying oscillator plus connectivity (VOC) model that  
 174 consists of local neuronal ensembles with varying local parameters, plus a  
 175 global coupling parameter, structural connectivity, and transmission delay,  
 176 and (3) the identical oscillators plus connectivity (IOC) model that consists  
 177 of local neuronal ensembles with uniform local parameters, plus a global  
 178 coupling parameter, structural connectivity, and transmission delay.

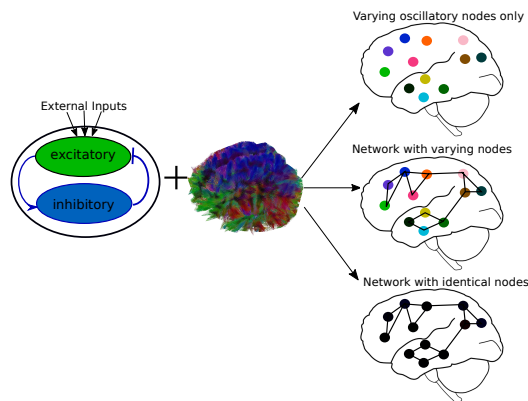

Figure 1: Variations of the Wilson-Cowan model. Varying oscillators (VO) at each node without connectivity, varying oscillators at each node plus connectivity (VOC), or identical oscillators at each node plus connectivity (IOC)

### 179 2.5. Evaluating Oscillatory Abilities of the Neural Mass Model

180 To assess if the neural mass models are able to produce a frequency pro-  
 181 file that covers all signature physiological frequency bands, we performed 2-  
 182 seconds simulations with varying parameters. Firstly, simulations at a single  
 183 node with no connectivity were performed with varying excitatory and in-  
 184 hibitory time constant parameters ( $\tau_e, \tau_i$ ) operating in the range  $1ms - 40ms$   
 185 with a step size of  $1ms$  and an external driving parameter of  $P(t) = 2.5$ .  
 186 When the structural connectivity matrix is introduced, the global coupling

187 parameter  $c_5$  and transmission velocity also dictate oscillatory activity. For  
188 the 86-region network model, we varied the global coupling parameter from 0  
189 to 3 with a step size of 0.2. Upon identifying the value of  $c_5$  for which the net-  
190 work model transitioned to oscillatory behavior (as done previously in [36]),  
191 additional 1-second simulations were performed with varying transmission  
192 velocity from  $5m/s$  to  $50m/s$  with a step size of  $5m/s$ . The power spectra  
193 of each simulation were computed to select the peak oscillatory frequency.  
194 All power spectra calculations were performed with MATLAB's multi-taper  
195 power spectral density estimate function *PMTM*. Simulations were performed  
196 with default local parameters as illustrated in [36]:  $c_1 = 16, c_2 = 12, c_3 =$   
197  $15, c_4 = 3$ , and sigmoidal function parameters:  $a_e = 1.3, a_i = 2, \theta_e = 4, \theta_i =$   
198  $3.7$ .

## 199 2.6. Model Optimization

200 The model was implemented using simulation runs of 3 seconds, using a  
201 numerical integration time step of  $\Delta t = 0.004$  sec or  $250Hz$  with MATLAB's  
202 *ode45* function. The noise term in the model was removed to maintain an  
203 unchanging parameter space during optimization. To improve the odds that  
204 we capture the global minimum of a suitably defined goodness of fit (GOF)  
205 criterion in our parameter space, we chose to implement the probabilistic  
206 approach of simulated annealing [28]. The algorithm samples a very large  
207 set of parameters within a set of boundaries by generating an initial trial  
208 point and choosing the next trial point from the current point by a probability  
209 distribution with a scale depending on the current "temperature" parameter.  
210 While the algorithm always accepts new trial points that map to cost-function  
211 values lower than the previous cost-function values, it will also accept trial  
212 points that have cost-functions with greater values than the previous point  
213 to move out of local minima. The acceptance probability function is  $1/(1 +$   
214  $e^{\frac{\Delta}{max(T)}}$ ), where  $T$  is the current temperature and  $\Delta$  is the difference of the  
215 new minus old cost-function values.

216 Our cost-function was defined as the two-sample Kolmogorov-Smirnov  
217 (KS) statistic between the empirical source localized spectra and simulated  
218 spectra from each model variation. The initial parameter value and boundary  
219 constraints for each parameter are given in Table 1; these had the same values  
220 regardless of model variation.

221 All simulated annealing runs were allowed to iterate over the parameter  
222 space for a maximum of  $N_p \times 500$ , where  $N_p$  is the number of parameters  
223 in the model. To ensure the optimization algorithm thoroughly scanned



|                                           | Initial Value              | Lower/Upper Boundary |
|-------------------------------------------|----------------------------|----------------------|
| Time constants $\{\tau_e, \tau_i\}$       | 20ms                       | [5ms, 30ms]          |
| Local Parameters $\{C_1, C_2, C_3, C_4\}$ | 16, 12, 15, 3 respectively | [1, 20]              |
| Global Coupling $C_5$                     | 1.5                        | [0, 10]              |
| Transmission Velocity                     | 10m/s                      | [5m/s, 30m/s]        |
| External Input $P(t)$                     | 2.5                        | [2.0, 3.0]           |

Table 1: Initial values and boundary constraints for all model parameters in the simulated annealing optimization

224 the parameter space and arrived at a global minimum within the bound-  
225 ary constraints, the initial temperature was raised to 200 (default = 100)  
226 for all parameters, and the cooling schedule was set to the average of the  
227 quotient between initial temperature and the iteration number for each pa-  
228 rameter. Such a cooling schedule ensures that the temperature is low at  
229 high iteration counts, so that the optimization algorithm only travels along  
230 the downward slope of the current minimum. The VO model was optimized  
231 first to obtain parameters for time constants, local parameters, and the ex-  
232 ternal drive parameter. Then these local parameters were fixed in the VOC  
233 model optimization that focused on the global parameters of global coupling  
234 and transmission velocity. The IOC model’s optimization was performed to  
235 identify global parameters and one set of local parameters for all 86 brain  
236 regions. To ensure that we reached the optimal parameters for the VOC  
237 model, we performed an additional optimization where the local parameters  
238 were allowed to vary. A conditional minimization algorithm was employed  
239 where simulated annealing was performed alternatively for local parameters  
240 and global parameters over 10 iterations (VOC-CM). Upon the 10th itera-  
241 tion, four subjects showed slight decreases in cost-function evaluation from  
242 the 9th iteration. Upon further inspection, their changes in cost-function  
243 was smaller than 0.5% from the previous iteration. To ensure convergence,  
244 we continued their optimization to 15 iterations to avoid local minima.

### 245 2.7. Model Performance and Analysis of Simulated Power Distribution

246 Simulated power spectra were obtained after reintroducing the Gaussian  
247 noise term ( $\sigma = 0.00001$ ) back into the model and allowing it to run for  
248 the duration of the simulations. We calculated the average spectra over  
249 10 different model simulations to account for noise for each set of optimized  
250 parameters. Each brain region’s source localized and simulated power spectra

251 were split into alpha ( $8 - 12Hz$ ) and beta ( $12 - 25Hz$ ) bands, the total  
252 power in each band were computed by summing the normalized power after  
253 subtracting the mean at each frequency bin. Visualization of regional alpha  
254 and beta band power are displayed on glassbrains generated with an open-  
255 source tool "Brainography" developed by our group [30].

256 We also computed the Kolmogorov-Smirnov statistic between the source  
257 localized spectra and each model variations simulated spectra for each brain  
258 region. Due to the non-Gaussian distribution in the Kolmogorov-Smirnov  
259 statistic at the end of all simulations, a Wilcoxon rank-sum test was used  
260 to compare the distribution of Kolmogoriv-Smirnov statistics between the  
261 three model versions. All parameters that fell within  $\pm 1\%$  of the median op-  
262 timized Kolmogorov-Smirnov statistics in VO and VOC-CM were extracted  
263 for visualization of their distribution.

### 264 3. Results

#### 265 3.1. Model parameters produce oscillations in all frequency ranges

266 To ensure that our proposed model variations can produce oscillations in  
267 most physiological frequencies, we repeatedly simulated single node dynam-  
268 ics without any connectivity for 2-seconds while systematically varying the  
269 excitatory and inhibitory time constants. For each combination of the time  
270 constants, we examined whether the model produced an oscillatory wave  
271 form, and the peak frequency of the oscillations was extracted and assigned  
272 to a defined frequency band. Figure 2 clearly shows that the model is able to  
273 produce all frequencies up to  $45Hz$ . More importantly, the entire frequency  
274 range is covered by time constants ranging from  $0 - 40ms$ , which is consistent  
275 with most models [8, 49, 54, 24, 42]. For each frequency band, a characteris-  
276 tic waveform is shown with its corresponding power spectra. External input  
277  $P(t)$  was set to  $P(t) = 2.5$  to ensure the uncoupled model is in a limited cycle  
278 regime within the normal biological range for neuronal activity. The effect  
279 of the external drive parameter is shown in Figure S3, where the simulations  
280 show oscillatory behavior near  $P(t) = 2.5$ .

281 Using the same set of local parameters, we simulated the network dynam-  
282 ics of 86 interconnected regions using one structural connectivity matrix, a  
283 transmission velocity of ten meters per second, and varying global coupling  
284 parameter  $c_5$  ranging from 0 to 3. A representative subject's structural con-  
285 nectivity i.e. weighted connectivity matrix whose elements represent the  
286 amount of fiber tracts connecting different regions, is given in Fig. S2, and

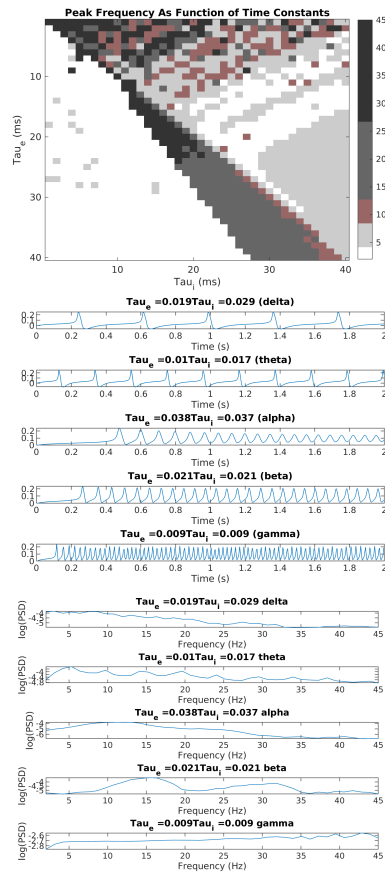

Figure 2: Peak frequency depends on time constants. Top: Heat map of models peak frequency (Hz) as a function of the excitatory and inhibitory time constants. Middle: oscillatory time course showing different peak frequencies, their corresponding power spectra is shown to the bottom.

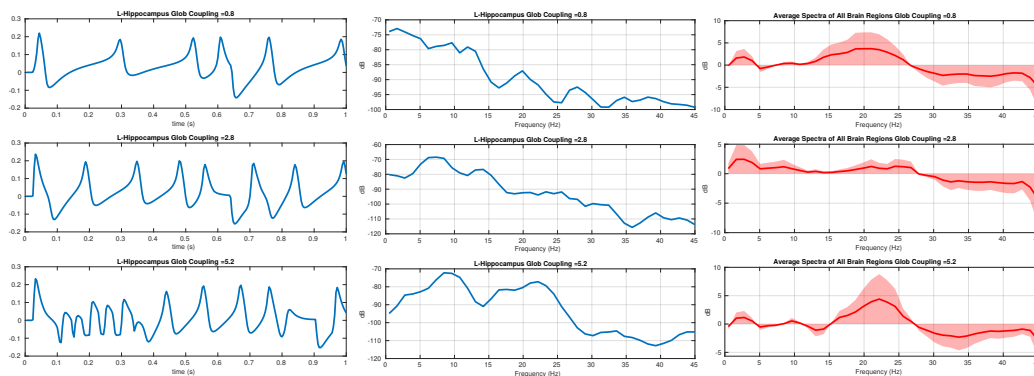

Figure 3: Global coupling controls oscillations. As the global coupling parameter increases, the simulated time series of a particular region is oscillating at higher frequencies as shown on the left column, each time series’ corresponding power spectra is shown in the middle. The right column shows the average spectra of all 86 brain regions after removing the mean. Transmission velocity between brain regions was held to a constant ( $10m/s$ ) for all simulations.

287 the simulated time series and power spectra are shown in 3. The external  
 288 input parameter was lowered to  $P(t) = 1.5$  for these simulations to make  
 289 sure that global coupling and connectivity was the main driver of oscilla-  
 290 tions (see Fig S3). The specific external input parameter value was chosen  
 291 because Muldoon et al. [36] showed default model parameters injected with  
 292  $P(t) = 1.5$  shifted the model from a low oscillatory state to a high oscilla-  
 293 tory state. On the hand, using the same structural connectivity matrix, we  
 294 simulated network dynamics while varying transmission velocity  $v$  ranging  
 295 from  $5m/s$  to  $50m/s$  and holding global coupling to  $c_5 = 1.5$  for all simu-  
 296 lation instances. 4 shows that transmission velocity has a subtle effect on  
 297 the simulated time series. Despite changes in peak frequency for individual  
 298 brain regions from slow speed ( $5m/s$ ) to faster speeds ( $25m/s$  and  $50m/s$ ),  
 299 the average power spectrum from all simulated brain regions in the network  
 300 remained the same regardless of transmission velocity  $v$ .

### 301 3.2. Optimized neural mass models

302 Most optimizations terminated upon reaching the maximum number of it-  
 303 erations allowed, which is  $N_{parameters} \times 500$  iterations. However, the minimum  
 304 within the boundary constraints was acquired before reaching the maximum  
 305 iteration, the simulated annealing algorithm accepts additional function eval-  
 306 uations after acquiring a minimum to scan the rest of the parameter space,

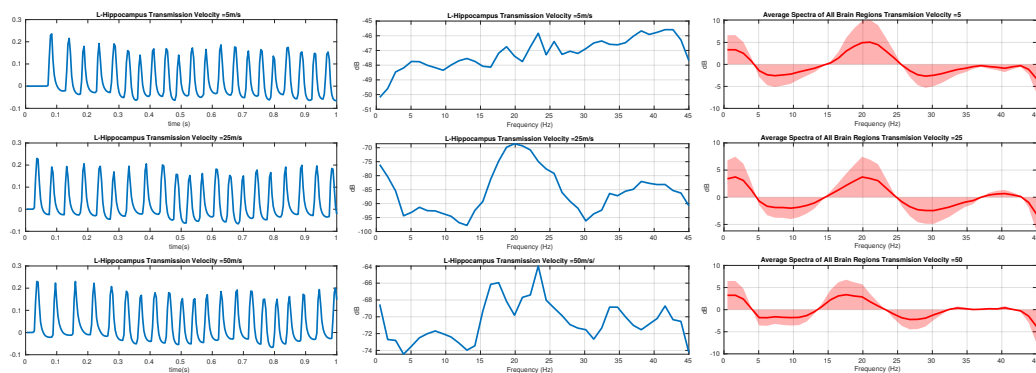

Figure 4: Transmission velocity and oscillatory behavior. In the network model, increasing the transmission velocity causes a time shift of the incoming signal; the left column shows the effect of the delay on 1 second simulated time course. The middle column shows the effect of transmission velocity on the corresponding power spectra. The right column shows the average spectra of all 86 brain regions after removing the mean. Global coupling was held to  $c_5 = 1.5$  for all simulations.

307 none of the optimization runs terminated while the cost-function evaluations  
 308 were decreasing. None of the optimized parameters were reported to be equal  
 309 to the upper or lower boundary, thus the specified range was not overly nar-  
 310 row, and a minimum was found within the bounds in all cases. The mean and  
 311 standard deviation of all parameters are reported in Table 2. Recall that the  
 312 three models we evaluated were: regionally varying oscillators (VO), region-  
 313 ally identical oscillators coupled by structural connectivity (IOC) and, region-  
 314 ally varying oscillators coupled by connectivity (VOC). We also evaluated the  
 315 VOC model with iterative optimization of local and global parameters (de-  
 316 noted (VOC-CM). We observe that there is a difference between excitatory  
 317 and inhibitory local parameters ( $c_1, c_3$  and  $c_2, c_4$  respectively), with the ex-  
 318 citatory constants being consistently larger than inhibitory constants across  
 319 all model variations. This slight variation between excitatory and inhibitory  
 320 parameters in network models reflect physiological conditions and is crucial  
 321 in producing functional neuronal activity. In terms of time constants, we see  
 322 the excitatory term being slightly lower than the inhibitory term. Similarly,  
 323 global coupling parameters are relatively low in VOC models compared to  
 324 IOC, however, we see that IOC model parameters have high optimal values as  
 325 well as high variation across all subjects, suggesting that higher connectome  
 326 coupling is required to optimize the IOC model.

327 Figure 5 (top) shows the cost-function values for the conditional min-

|                             | <b>VO</b>             | <b>VOC</b>            | <b>VOC-CM</b>         | <b>IOC</b>            |
|-----------------------------|-----------------------|-----------------------|-----------------------|-----------------------|
| Time constants (ms)         | $\tau_e = 15.2(3.0)$  | $\tau_e = 15.2(3.0)$  | $\tau_e = 15.7(2.6)$  | $\tau_e = 18.1(9.0)$  |
|                             | $\tau_i = 19.4(2.9)$  | $\tau_i = 19.4(2.9)$  | $\tau_i = 18.2(2.7)$  | $\tau_i = 24.8(8.8)$  |
| Local Parameters            | $c_1 = 14.38(1.502)$  | $c_1 = 14.38(1.502)$  | $c_1 = 16.23$         | $c_1 = 17.09(3.465)$  |
|                             | $c_2 = 9.989(2.166)$  | $c_2 = 9.989(2.166)$  | $c_2 = 7.497(1.541)$  | $c_2 = 5.032(3.743)$  |
|                             | $c_3 = 15.19(1.534)$  | $c_3 = 15.19(1.534)$  | $c_3 = 16.63(0.955)$  | $c_3 = 19.13(1.000)$  |
|                             | $c_4 = 6.117(1.794)$  | $c_4 = 6.117(1.794)$  | $c_4 = 4.633(1.153)$  | $c_4 = 4.082(2.711)$  |
| External Input              | $P(t) = 2.664(0.094)$ | $P(t) = 2.664(0.094)$ | $P(t) = 2.660(0.013)$ | $P(t) = 2.607(0.409)$ |
| Global Coupling             |                       | $c_5 = 0.018(0.043)$  | $c_5 = 0.003(0.0075)$ | $c_5 = 5.093(3.697)$  |
| Transmission Velocity (m/s) |                       | $v = 8.714(4.455)$    | $v = 11.24(3.56)$     | $v = 11.75(5.506)$    |

Table 2: Mean (standard deviation) of model parameters for all model variations. VO = Varying Oscillators, VOC = Varying Oscillators with connectivity, VOC-CM = Varying Oscillators with connectivity and optimized by CM, IOC = Identical Oscillators with connectivity.

328 imization iterations over the global and local parameters in the VOC-CM  
329 optimization task. We see that the local parameter optimization iterations  
330 always result in a lower cost-function value than when optimizing over global  
331 parameters. However if we compare all of the global cost-function values  
332 and all the local cost-function values we see a downward trend in both that  
333 begins to flatten around iteration 7. Further iterations do not materially  
334 improve the fits, as it appears that the CM optimization has converged. The  
335 jaggedness of the curve also shows the importance of allowing an increase  
336 in the cost-function between the local- and global-steps, since otherwise no  
337 global step would improve upon the initial solution involving only local op-  
338 timization. The CM performance for all all subjects is shown in Fig. S4.

339 To determine the effect of global coupling on model performance, we  
340 gradually increased the global coupling parameter in the VOC model while  
341 holding transmission velocity constant. We had hypothesized that introduc-  
342 ing global coupling, structural connectivity, and transmission delay would  
343 improve the parameter space and yield a lower cost-function, but our results  
344 show the exact opposite. Figure 5 (bottom) shows that introducing global  
345 coupling is an uphill move in terms of cost-function evaluations and the cor-  
346 responding changes in parameter space does not improve model performance.  
347 Alongside Fig 5 and 6, we see that re-optimizing for the global coupling and  
348 transmission velocity parameters in VOC cannot return the cost-function  
349 evaluations to the minimum achieved by local parameters only (VO).

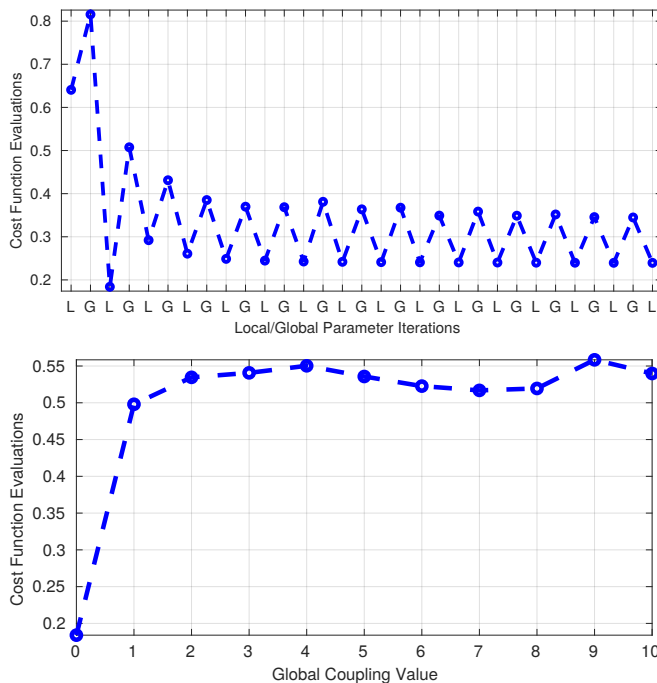

Figure 5: Top: Conditional minimization performance. The CM algorithm alternatively optimized local parameters and global parameters of the VCN model for 15 iterations. The optimized local parameters consistently resulted in lower cost-function evaluations than global parameters over all iterations. The final iteration was used as the set of optimized parameter for further analysis. Bottom: Global coupling parameter changes the parameter space. Introducing a structural connectivity matrix with increasing global coupling parameter increases the cost-function evaluation, but does not continuously increase the evaluations as global coupling increases.

350 Figure 6 (left) shows the boxplots of the Kolmogorov-Smirnov (KS) statis-  
 351 tic between the source localized power spectra and its corresponding simu-  
 352 lated power spectra from each model variation over each of the 86 brain  
 353 regions in each of the 7 subjects. The best performing model was the indi-  
 354 vidual oscillators fitted to the source localized spectra at each node (VO). VO  
 355 and VOC-CM was able to minimize the KS-statistic by optimizing for each  
 356 individual ROI, whereas IOC and VOC required minimizing for the average  
 357 KS-statistic of all 86 ROIs, therefore a high variance around the median is  
 358 shown in their box-plots. Contrary to our belief that connectivity improves  
 359 fitting, introducing a connectome and global coupling to optimized oscil-  
 360 lators resulted in higher cost-function evaluations (VOC). Using one set of

361 local parameters for all brain regions in IOC produced similar results to VOC  
 362 ( $P = 0.1899$ ). On the other hand, optimizing the VOC model variation with  
 363 the CM algorithm resulted in a much better model performance; the model  
 364 fit of VOC-CM was significantly better than IOC and VOC ( $P < 0.0001$ ).

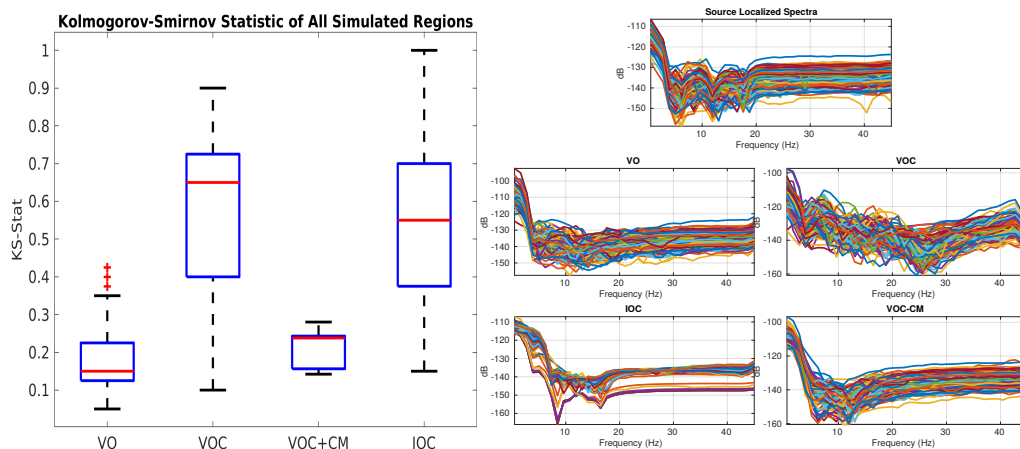

Figure 6: Comparison of model performance. Left: Summary of Kolmogorov-Smirnov statistics between different model variations (VO = varying oscillators, VOC = varying oscillators with connectivity, VOC+CM = varying oscillators with connectivity, optimized via CM, IOC = identical oscillators with connectivity) over all 86 ROIs and all 7 subjects. Right: Source localized power spectra and simulated model power spectra for all 86 regions averaged over all subjects.

|             | VO vs. VOC          | VO vs. IOC          | VOC vs. IOC         | VO vs. VOC+CM       | VOC vs. VOC+CM      | IOC vs. VOC+CM      |
|-------------|---------------------|---------------------|---------------------|---------------------|---------------------|---------------------|
| Z-score     | -27.21              | -27.78              | 2.149               | -11.85              | 26.29               | 27.98               |
| W statistic | $1.987 \times 10^5$ | $1.952 \times 10^5$ | $3.757 \times 10^5$ | $2.912 \times 10^5$ | $5.212 \times 10^5$ | $5.315 \times 10^5$ |
| P-Value     | $P < 0.0001 **$     | $P < 0.0001 **$     | $P = 0.1899$        | $P < 0.0001 **$     | $P < 0.0001 **$     | $P < 0.0001 **$     |

Table 3: Table summarizing the Wilcoxon rank-sum test used to compare Kolmogorov-Smirnov statistics between different model implementations. All p-values reported were adjusted for multiple comparisons (Bonferoni).

365 The source localized power spectra of all regions and their corresponding  
 366 simulated power spectra for each model variation are visualized in Fig. 6.  
 367 The source localized spectra show a clear alpha peak at  $8 - 12 Hz$  and a beta  
 368 peak with lower power at near  $20 Hz$ , which is characteristic of normal neu-  
 369 rophysiological frequency profiles. Consistent with our KS-statistic results in  
 370 Fig. 6, we see that the average IOC spectra does not show these characteris-  
 371 tic peaks while other model variations do to a limited degree. The optimized



372 parameters in Table 2 show relatively high variances in IOC compared to  
373 other models, and the parameter means between excitatory and inhibitory  
374 time constants differ by a small amount, suggesting the optimization algo-  
375 rithm had trouble converging onto a parameter range that is suitable for this  
376 model variation. The consequence of having identical parameters for each  
377 node and small differences between excitatory and inhibitory parameters for  
378 IOC is shown in Fig. 7, where each region’s spectra are less likely to have  
379 various peaks and troughs. Despite the VO and VOC-CM spectra having a  
380 lower KS-statistic than other spectra in Fig. 6, their beta activity is not as  
381 distinct as what’s shown in the source localized spectra. Finally, with the  
382 exception of IOC, the remaining model variations recapitulates the observed  
383 alpha peaks in the source localized spectra to a limited degree.

### 384 *3.3. Spatially distributed patterns of power spectra*

385 Figure 7 illustrates via surface-plots the alpha band power ( $8 - 12Hz$ )  
386 over the entire brain for the observed and simulated spectra averaged from  
387 all subjects. Each of the cortical regions are colored by the intensity of that  
388 region’s alpha power scaled by the mean alpha power over all brain regions.  
389 As expected, the source localized spectra (top row) shows relatively larger  
390 spheres in the posterior regions of the brain. The VO, VOC, and VOC-CM  
391 models show the same trend, although they are distributed more laterally  
392 than the observed alpha distribution. The IOC model did not match the  
393 alpha spectra spatial pattern at all, with only a small number of regions that  
394 contain alpha powers significantly above the mean. The Pearson’s correlation  
395 coefficients are displayed on top of each glass-brain plot, and as expected,  
396 VO and VOC-CM had the highest correlation when comparing the 86 brain  
397 region’s alpha powers.

398 From the optimization results in Figure 5, we already see a change of less  
399 than 1% in cost function evaluations as the conditional minimization algo-  
400 rithm approached the 10<sup>th</sup> iteration, suggesting any of the solutions along the  
401 end of the conditional minimization algorithm could be a plausible solution.  
402 We selected parameter sets that computed cost-function evaluations within  
403  $\pm 1\%$  range of the final cost-function evaluation. The probability distribution  
404 of these optimized parameters are shown in Figure 8. The majority of the  
405 parameters from varying oscillators (VO) model shows a bimodal distribu-  
406 tion, with many peaks in the histogram suggesting different viable solutions  
407 that satisfies our goodness-of-fit criteria. On the other hand, the parameters  
408 chosen from the final iteration of the VOC-CM model shows a less obvious

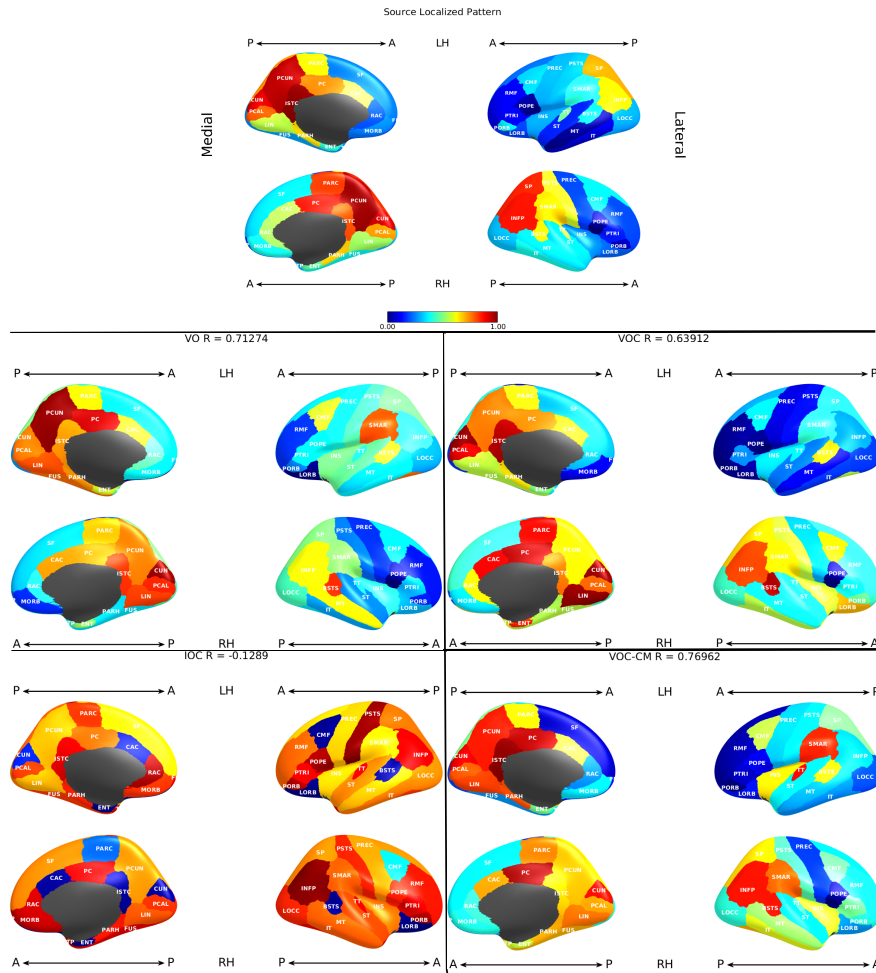

Figure 7: Spatial distribution of alpha band. Surface plots showing the power in the alpha band averaged across all subjects. From top to bottom: (1) empirical data, (2) varying oscillators (VO) model, (3) varying oscillators with connectivity (VOC), (4) identical oscillators with connectivity (IOC), and (5) varying oscillators with connectivity, optimized using conditional minimization (VOC-CM). The color intensity indicates the amount of power within the 8–12Hz range in the frequency domain, scaled by the mean of the alpha power over each region.

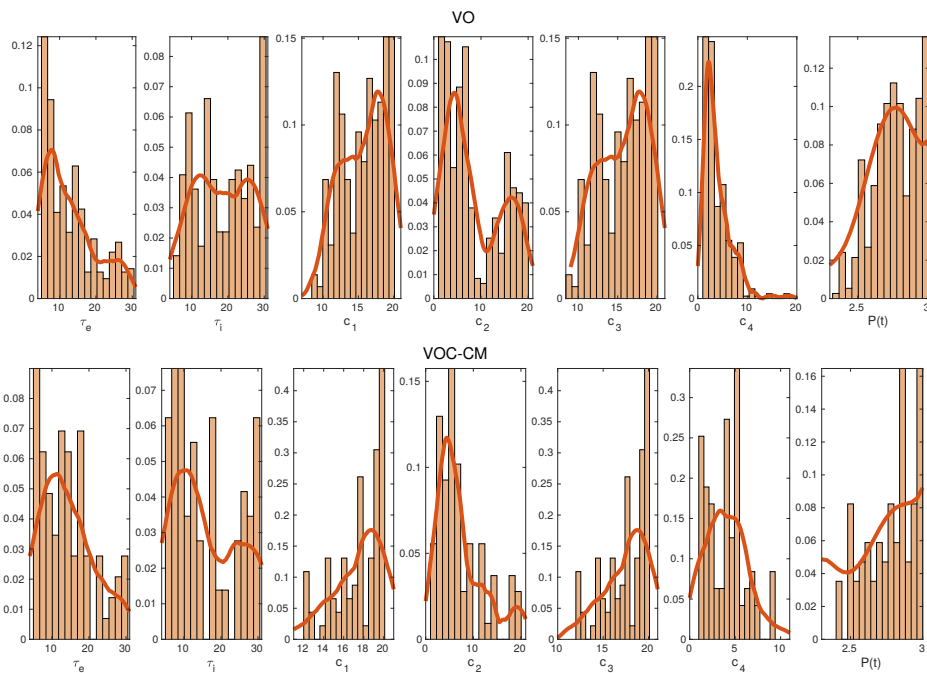

Figure 8: Best Fitting Model Parameters. Histograms showing the probability distribution of parameters chosen from  $\pm 1\%$  of the best fitting solution for the varying oscillators (VO, top) model and varying oscillators with connectivity, optimized using conditional minimization (VOC-CM, bottom).

409 bimodal distribution with the exception of  $\tau_i$ . Additionally, the histogram  
 410 peaks suggest that there are at least two highly probable parameter values  
 411 for each parameter in both cases. Despite conditional minimization converging  
 412 to a low cost-function evaluation that drop less than 1% after the 10th iter-  
 413 ation, the parameters were still unable to converge to a single value, further  
 414 emphasizing the difficulty of finding unique solutions to an over-specified  
 415 model.

#### 416 4. Discussion

417 A challenge for emerging models of brain activity is that in a complex  
 418 dynamical system such as the brain, it is difficult to predict function even if  
 419 the underlying architecture, local cortical dynamics, and cortical-cortical in-  
 420 teractions are known. In the present article, we studied the role of local and  
 421 global parameters in a system of coupled oscillating neural mass (Wilson-

422 Cowan) models, either unconnected or connected via white matter fibers as  
423 measured from diffusion-MRI. As described in previous network modeling  
424 efforts, coupled dynamical systems have a collective behavior that depends  
425 on the network structure, the local dynamics of each node, and the coupling  
426 function for the transfer of information [45, 21, 34]. Using different imple-  
427 mentations of the Wilson-Cowan oscillator model, we reproduced to varying  
428 degrees of success spatially varying spectral features of human source local-  
429 ized EEG at rest. Our results show that 1) introduction of the connectome  
430 to the oscillator model does not improve model fitting to source localized  
431 EEG, 2) the identifiability problem manifests itself in the model's parameter  
432 space as well as the spatial distribution of the modeled frequency profile.

433 First, we aimed to determine which configuration of our chosen neural  
434 mass model best reproduces source localized EEG data. From our simula-  
435 tions, it is clear that a model of individual oscillators at each brain region  
436 (VO) is capable of reproducing the spatial and spectral patterns of EEG data.  
437 While the absence of network topology in the VO model does not correctly  
438 depict the interconnected brain regions, the one pair of oscillator model per  
439 brain region fitting criteria is a much easier parameter inference problem than  
440 inferring network model parameters. VOs simulations produced a mean KS-  
441 stat of around 0.15, which is lowest out of all model variations. On the other  
442 hand, network models (VOC, VOC-CM) were also able to produce the alpha  
443 and beta spatial patterns that closely matched our source localized EEG  
444 data. The Jansen and Rit model [24] utilized realistic ratios of excitatory  
445 and inhibitory connections in a neuronal ensemble to arrive at their param-  
446 eter values, David and Friston [8] expanded on this idea and established a  
447 neural mass model with similar differences between excitatory and inhibitory  
448 parameters. Interestingly, IOC parameters exhibiting this difference between  
449 excitatory and inhibitory parameter values were not able to produce a sat-  
450 isfactory spectra or a posteriorly distributed alpha pattern, indicating the  
451 importance of allowing spatially varying local parameters in order to pro-  
452 duce characteristic neuronal patterns. In the IOC model, the only terms  
453 driving regional differences in the brain were the connectivity matrix, global  
454 coupling, and transmission velocity, which is an indirect way of determining  
455 the effect of introducing a connectome to an optimized network. Surpris-  
456 ingly, despite it's anatomical relevance, the structural connectivity does not  
457 improve the model performance, but drastically alters the parameter space  
458 instead.

459 Our results show a simple addition of network connectivity to individual

460 oscillators optimized independently at all brain regions does not improve the  
461 performance of the model. As shown in Figure 5 and 6, no amount of con-  
462 nectome coupling, while keeping the VO local parameters, improves model  
463 performance; in fact, it makes is substantially worse, with the KS-statistic  
464 cost function plateauing around 0.5-0.55 as global coupling increased gradu-  
465 ally, compared to the KS cost of the VO model of less than 0.2. We conjecture  
466 that the one-to-one fitting without any connectivity and transmission veloc-  
467 ity influences may have provided a simpler optimization problem than the  
468 network models. Because we used optimized local parameters from the VO  
469 model in VOC model, we expected similar or better model performance with  
470 the addition of a more physiological, interconnected brain network. However,  
471 despite optimized local dynamics at each node, the interconnected regions  
472 introduced an uphill move for the optimization algorithm instead of a down-  
473 hill move, suggesting the feedback from adjacent regions may be changing  
474 local dynamics that are not explainable by just a global coupling parameter  
475 and transmission velocity. Our conditional minimization algorithm was able  
476 to optimize our local and global parameters iteratively until we obtained  
477 a set of parameters that outperformed VOC. As described above, despite  
478 IOC having identical nodes, meaning only one set of local parameters for  
479 the entire network, the inferred parameters are high in variance and do not  
480 reflect neurophysiological conditions. This is consistent with the findings by  
481 [2], suggesting that network dynamics do not only depend on anatomical  
482 connectivity, but also on "state-dependent dynamical regimes of the brain  
483 regions" and on the heterogeneity of node degrees.

484 The surface-plots displaying the spatial distribution of each model vari-  
485 ation's alpha pattern highlight the identifiability problem of network neural  
486 mass models. Despite the differences in parameterization, all models show  
487 spatial alpha patterns that are identical to each other with the exception  
488 of IOC. In the frequency domain, there are recognizable differences in the  
489 power spectra produced by each model, however, the minor differences do  
490 not necessarily capture the neurophysiological oscillations that translates to  
491 function. Additionally, the histograms in 8 shows there are many probable  
492 solutions that provide satisfactory spectra according to our goodness-of-fit  
493 criterion.

494 To capture function deteriorations in a diseased brain by mathematical  
495 models, there has been many recent attempts to correlate neural mass model  
496 parameters with stroke recovery [13, 12, 1], Alzheimer's disease [58], and  
497 epilepsy [27]. However, all these efforts neglect the over-parameterization of

498 the models by expanding neural masses to networks in order to maximize a  
499 fit to functional connectivity. Correlating a set of parameters with a change  
500 in functional connectivity does not mean such parameter shifts are meaning-  
501 ful enough to diagnose disease, as another set of parameters may capture the  
502 same functional connectivity just as well. Our results show the manifestation  
503 of identifiability problems in neural mass models as a challenge to diagnosing  
504 disease via mathematical models, as network models need to capture both  
505 functional and spatial information in order to fully capture disease spread.  
506 During parameter inference, careful inspection of the parameter distribution  
507 and model behavior is needed to obtain parameters that converged to a uni-  
508 form distribution. We believe low dimensional models with parameter con-  
509 straints may avoid the identifiability problem and provide more meaningful  
510 model parameters.

## 511 5. Bibliography

- 512 [1] Mohit H Adhikari, A. Raja Beharelle, Alessandra Griffa, Patric  
513 Haggmann, Ana Solodkin, A. R. McIntosh, Steven L Small, and  
514 Gustavo Deco. Computational Modeling of Resting-State Activity  
515 Demonstrates Markers of Normalcy in Children with Prenatal  
516 or Perinatal Stroke. *Journal of Neuroscience*, 35(23):8914–8924,  
517 2015. ISSN 0270-6474. doi: 10.1523/JNEUROSCI.4560-  
518 14.2015. URL <http://surfer.nmr.mgh.harvard.edu>  
519 <http://www.jneurosci.org/cgi/doi/10.1523/JNEUROSCI.4560-14.2015>.
- 520 [2] R. G. Bettinardi, G. Deco, V. M. Karlaftis, T. J. Van Hartevelt,  
521 H. M. Fernandes, Z. Kourtzi, M. L. Kringelbach, and G. Zamora-  
522 López. How structure sculpts function: Unveiling the contribu-  
523 tion of anatomical connectivity to the brain’s spontaneous cor-  
524 relation structure. *Chaos*, 27(4), 2017. ISSN 10541500. doi:  
525 10.1063/1.4980099.
- 526 [3] Mary A.B. Brazier. Studies of the EEG activity of lim-  
527 bic structures in man. *Electroencephalography and Clin-  
528 ical Neurophysiology*, 25(4):309–318, oct 1968. ISSN  
529 00134694. doi: 10.1016/0013-4694(68)90171-5. URL  
530 <http://www.ncbi.nlm.nih.gov/pubmed/4176535>.

- 531 [4] Michael Breakspear. Dynamic models of large-scale brain activity,  
532 2017. ISSN 15461726.
- 533 [5] Randy L. Buckner, Jessica R. Andrews-Hanna, and Daniel L.  
534 Schacter. The brain's default network: Anatomy, function, and  
535 relevance to disease. *Annals of the New York Academy of Sciences*,  
536 1124:1–38, 2008. ISSN 00778923. doi: 10.1196/annals.1440.011.
- 537 [6] Vladimir L. Cherkassky, Rajesh K. Kana, Timothy A. Keller, and  
538 Marcel Adam Just. Functional connectivity in a baseline resting-  
539 state network in autism. *NeuroReport*, 17(16):1687–1690, nov 2006.  
540 ISSN 09594965. doi: 10.1097/01.wnr.0000239956.45448.4c. URL  
541 <https://insights.ovid.com/crossref?an=00001756-200611060-00006>.
- 542 [7] Alexander L. Cohen, Damien A. Fair, Nico U.F. Dosenbach, Fran-  
543 cis M. Miezin, Donna Dierker, David C. Van Essen, Bradley L.  
544 Schlaggar, and Steven E. Petersen. Defining functional ar-  
545 eas in individual human brains using resting functional con-  
546 nectivity MRI. *NeuroImage*, 2008. ISSN 10538119. doi:  
547 10.1016/j.neuroimage.2008.01.066.
- 548 [8] Olivier David and Karl J Friston. A neural mass  
549 model for MEG/EEG: Coupling and neuronal dy-  
550 namics. *NeuroImage*, 20(3):1743–1755, 2003. ISSN  
551 10538119. doi: 10.1016/j.neuroimage.2003.07.015. URL  
552 <https://ac.els-cdn.com/S1053811903004579/1-s2.0-S1053811903004579-main.pdf>
- 553 [9] G. Deco, A. Ponce-Alvarez, D. Mantini, G. L. Romani, P. Hag-  
554 mann, and M. Corbetta. Resting-State Functional Connectivity  
555 Emerges from Structurally and Dynamically Shaped Slow Linear  
556 Fluctuations. *Journal of Neuroscience*, 2013. ISSN 01689002. doi:  
557 10.1016/0168-9002(91)91092-A.
- 558 [10] Gustavo Deco, Mario Senden, and Viktor Jirsa. How anatomy  
559 shapes dynamics: a semi-analytical study of the brain at rest by a  
560 simple spin model. *Frontiers in computational neuroscience*, 6:68,  
561 jan 2012. ISSN 1662-5188. doi: 10.3389/fncom.2012.00068.
- 562 [11] Gustavo Deco, Joana Cabral, Mark W. Woolrich, Angus B.A.  
563 Stevner, Tim J. van Hartevelt, and Morten L. Kringel-  
564 bach. Single or multiple frequency generators in on-going

- 565 brain activity: A mechanistic whole-brain model of empir-  
566 ical MEG data. *NeuroImage*, 152:538–550, 2017. ISSN  
567 10959572. doi: 10.1016/j.neuroimage.2017.03.023. URL  
568 <http://dx.doi.org/10.1016/j.neuroimage.2017.03.023>.
- [12] Maria I Falcon, Viktor Jirsa, and Ana Solodkin. A new neuroin-  
569 formatics approach to personalized medicine in neurology: The  
570 Virtual Brain. *Current opinion in neurology*, 29(4):429–36, aug  
571 2016. ISSN 1473-6551. doi: 10.1097/WCO.0000000000000344.  
572 URL <http://www.ncbi.nlm.nih.gov/pubmed/27224088>  
573 <http://www.pubmedcentral.nih.gov/articlerender.fcgi?artid=PMC5536184>.  
574
- [13] Maria Inez Falcon, Jeffrey D. Riley, Viktor Jirsa, Anthony R.  
575 McIntosh, Ahmed D. Shereen, E. Elinor Chen, and Ana Solodkin.  
576 The virtual brain: Modeling biological correlates of recovery after  
577 chronic stroke. *Frontiers in Neurology*, 6(NOV):1–13, 2015. ISSN  
578 16642295. doi: 10.3389/fneur.2015.00228.  
579
- [14] Holger Finger, Marlene B??nstrup, Bastian Cheng, Arnaud Mess??,  
580 Claus Hilgetag, G??tz Thomalla, Christian Gerloff, and Peter  
581 K??nig. Modeling of Large-Scale Functional Brain Networks Based  
582 on Structural Connectivity from DTI: Comparison with EEG De-  
583 rived Phase Coupling Networks and Evaluation of Alternative  
584 Methods along the Modeling Path. *PLoS Computational Biology*, 12  
585 (8):1–28, 2016. ISSN 15537358. doi: 10.1371/journal.pcbi.1005025.  
586
- [15] Bruce Fischl, David H Salat, Evelina Busa, Marilyn Albert, Megan  
587 Dieterich, Christian Haselgrove, Andre Van Der Kouwe, Ron Kil-  
588 liany, David Kennedy, Shuna Klaveness, Albert Montillo, Nikos  
589 Makris, Bruce Rosen, and Anders M Dale. Whole Brain Segmen-  
590 tation : Automated Labeling of Neuroanatomical Structures in the  
591 Human Brain. *Neuron*, 33:341–355, 2002.  
592
- [16] Walter J Freeman. Tutorial on neurobiology: from sin-  
593 gle neurons to brain chaos. *International Journal of Bi-*  
594 *furcation and Chaos*, 02(03):451–482, sep 1992. ISSN  
595 0218-1274. doi: 10.1142/S0218127492000653. URL  
596 <https://doi.org/10.1142/S0218127492000653>.  
597



- 598 [17] Enrique C.A. Hansen, Demian Battaglia, Andreas Spiegler, Gus-  
599 tavo Deco, and Viktor K. Jirsa. Functional connectivity dynamics:  
600 Modeling the switching behavior of the resting state. *NeuroImage*,  
601 2015. ISSN 10959572. doi: 10.1016/j.neuroimage.2014.11.001.
- 602 [18] Yong He, Zhang J. Chen, and Alan C. Evans. Small-world anatomi-  
603 cal networks in the human brain revealed by cortical thickness from  
604 MRI. *Cerebral Cortex*, 17(10):2407–2419, 2007. ISSN 10473211. doi:  
605 10.1093/cercor/bhl149.
- 606 [19] C J Holmes, R Hoge, L Collins, R Woods, a W Toga, and a C  
607 Evans. Enhancement of MR images using registration for signal  
608 averaging. *Journal of computer assisted tomography*, 22(2):324–333,  
609 2015. ISSN 0363-8715. doi: 10.1097/00004728-199803000-00032.  
610 URL <http://www.ncbi.nlm.nih.gov/pubmed/9530404>.
- 611 [20] C J Honey, C J Honey, O Sporns, O Sporns, L Cam-  
612 moun, L Cammoun, X Gigandet, X Gigandet, J P Thiran,  
613 J P Thiran, R Meuli, R Meuli, P Hagmann, and P Hag-  
614 mann. Predicting human resting-state functional connectivity  
615 from structural connectivity. *Proceedings of the National Academy  
616 of Sciences of the United States of America*, 106(6):2035–40,  
617 2009. ISSN 1091-6490. doi: 10.1073/pnas.0811168106. URL  
618 <http://www.ncbi.nlm.nih.gov/pubmed/19188601>.
- 619 [21] Liang Huang, Qingfei Chen, Ying Cheng Lai, and Louis M. Pecora.  
620 Generic behavior of master-stability functions in coupled nonlin-  
621 ear dynamical systems. *Physical Review E - Statistical, Nonlinear,  
622 and Soft Matter Physics*, 80(3):1–11, 2009. ISSN 15393755. doi:  
623 10.1103/PhysRevE.80.036204.
- 624 [22] K Huh, K J Meador, G P Lee, D W Loring, A M Murro,  
625 D W King, B B Gallagher, J R Smith, and H F Flan-  
626 gin. Human hippocampal EEG: effects of behavioral activation.  
627 *Neurology*, 40(8):1177–81, aug 1990. ISSN 0028-3878. URL  
628 <http://www.ncbi.nlm.nih.gov/pubmed/2116603>.
- 629 [23] Y. Iturria-Medina, E. J. Canales-Rodríguez, L. Melie-García,  
630 P. A. Valdés-Hernández, E. Martínez-Montes, Y. Alemán-Gómez,

- 631 and J. M. Sánchez-Bornot. Characterizing brain anatomical  
632 connections using diffusion weighted MRI and graph theory. *NeuroImage*, 36(3):645–660, 2007. ISSN 10538119. doi:  
633 10.1016/j.neuroimage.2007.02.012.  
634
- [24] Ben H Jansen and Vincent G Rit. Biological Cybernetics Electroencephalogram and visual evoked potential generation in a mathematical model of coupled cortical columns. Technical report, 1995. URL  
635 <https://link-springer-com.ezproxy.med.cornell.edu/content/pdf/10.1007%2FBF01062488>  
636  
637  
638
- [25] Herbert Jasper and Wilder Penfield. Electrocorticograms in man: Effect of voluntary movement upon the electrical activity of the precentral gyrus. *Archiv für Psychiatrie und Nervenkrankheiten*, 183(1-2):163–174, 1949. ISSN 00039373. doi: 10.1007/BF01062488.  
639  
640  
641  
642  
643 URL <http://link.springer.com/10.1007/BF01062488>.
- [26] V. K. Jirsa, O. Sporns, M. Breakspear, G. Deco, and A. R. McIntosh. Towards the virtual brain: Network modeling of the intact and the damaged brain. *Archives Italiennes de Biologie*, 148(3):189–205, 2010. ISSN 00039829. doi: 10.4449/AIB.V148I3.1223.  
644  
645  
646  
647
- [27] V.K. Jirsa, T. Proix, D. Perdikis, M.M. Woodman, H. Wang, J. Gonzalez-Martinez, C. Bernard, C. Bénar, M. Guye, P. Chauvel, and F. Bartolomei. The Virtual Epileptic Patient: Individualized whole-brain models of epilepsy spread. *NeuroImage*, 145:377–388, jan 2017. ISSN 1053-8119. doi: 10.1016/J.NEUROIMAGE.2016.04.049. URL  
648  
649  
650  
651  
652  
653  
654 <https://www.sciencedirect.com/science/article/pii/S1053811916300891>.
- [28] S Kirkpatrick, C D Gelatt, and M P Vecchi. Optimization by Simulated Annealing. *Science*, 220(4598):671–680, 1983.  
655  
656
- [29] A. Kuceyeski, S. Shah, J. P. Dyke, S. Bickel, F. Abdelnour, N. D. Schiff, H. U. Voss, and A. Raj. The application of a mathematical model linking structural and functional connectomes in severe brain injury. *NeuroImage: Clinical*, 11:635–647, 2016. ISSN 22131582. doi: 10.1016/j.nicl.2016.04.006. URL  
657  
658  
659  
660  
661  
662 <http://dx.doi.org/10.1016/j.nicl.2016.04.006>.

- 663 [30] E. LoCastro, A. Kuceyeski, and A. Raj. Brainography: an  
664 atlas-independent surface and network rendering tool for neu-  
665 ral connectivity visualization, apr 2014. ISSN 15590089. URL  
666 <http://link.springer.com/10.1007/s12021-013-9206-1>.
- 667 [31] F. H. Lopes da Silva, A. Hoeks, H. Smits, and L. H.  
668 Zetterberg. Model of brain rhythmic activity - The alpha-  
669 rhythm of the thalamus. *Kybernetik*, 15(1):27–37, may  
670 1974. ISSN 03401200. doi: 10.1007/BF00270757. URL  
671 <http://www.ncbi.nlm.nih.gov/pubmed/4853232>.
- 672 [32] D. Mantini, M G Perrucci, C Del Gratta, G L Romani, and  
673 M Corbetta. Electrophysiological signatures of resting state  
674 networks in the human brain. *Proceedings of the National Academy  
675 of Sciences of the United States of America*, 104(32):13170–  
676 5, 2007. ISSN 0027-8424. doi: 10.1073/pnas.0700668104. URL  
677 <http://www.ncbi.nlm.nih.gov/pubmed/17670949>  
<http://www.pubmedcentral.nih.gov/articlerender.fcgi?artid=3961181&tool=pmc>
- 678 [33] K J Meador, J L Thompson, D W Loring, A M Murro, D W  
679 King, B B Gallagher, G P Lee, J R Smith, and H F Flanigin.  
680 Behavioral state-specific changes in human hippocampal theta ac-  
681 tivity. *Neurology*, 41(6):869–72, jun 1991. ISSN 0028-3878. URL  
682 <http://www.ncbi.nlm.nih.gov/pubmed/2046932>.
- 683 [34] Arnaud Messé, David Rudrauf, Habib Benali, and Guillaume  
684 Marrelec. Relating structure and function in the human brain:  
685 relative contributions of anatomy, stationary dynamics, and non-  
686 stationarities. *PLoS computational biology*, 10(3):e1003530, mar  
687 2014. ISSN 1553-7358. doi: 10.1371/journal.pcbi.1003530. URL  
688 <http://www.pubmedcentral.nih.gov/articlerender.fcgi?artid=3961181&tool=pmc>
- 689 [35] Fabio Moroni, Lino Nobili, Fabrizio De Carli, Marcello Massi-  
690 mini, Stefano Francione, Cristina Marzano, Paola Proserpio, Carlo  
691 Cipolli, Luigi De Gennaro, and Michele Ferrara. Slow EEG rhythms  
692 and inter-hemispheric synchronization across sleep and wakefulness  
693 in the human hippocampus. *NeuroImage*, 60(1):497–504, mar  
694 2012. ISSN 10538119. doi: 10.1016/j.neuroimage.2011.11.093.  
695 URL <http://www.ncbi.nlm.nih.gov/pubmed/22178807>  
696 <http://linkinghub.elsevier.com/retrieve/pii/S10538119111013759>.

- 697 [36] Sarah Feldt Muldoon, Fabio Pasqualetti, Matthew Cieslak, Scott T.  
698 Grafton, Jean M. Vettel, and Danielle S. Bassett. Stimulation-  
699 Based Control of Dynamic Brain Networks. *PLoS computational biology*, 12(9):e1005076. doi:10.1371/journal.pcbi.1005076,  
700 2016. ISSN 00189286. doi: 10.1109/TAC.2015.2437520. URL  
701 <http://arxiv.org/abs/1601.00987>.  
702
- 703 [37] Masaki Nishida, Nobuhide Hirai, Fumikazu Miwakeichi,  
704 Taketoshi Maehara, Kensuke Kawai, Hiroyuki Shimizu, and  
705 Sunao Uchida. Theta oscillation in the human anterior  
706 cingulate cortex during all-night sleep: an electrocortico-  
707 graphic study. *Neuroscience Research*, 50(3):331–341, nov  
708 2004. ISSN 01680102. doi: 10.1016/j.neures.2004.08.004.  
709 URL <http://www.ncbi.nlm.nih.gov/pubmed/15488296>  
710 <http://linkinghub.elsevier.com/retrieve/pii/S0168010204002044>.
- 711 [38] Guido Nolte and George Dassios. Analytic expansion  
712 of the EEG lead field for realistic volume conductors.  
713 *Physics in Medicine and Biology*, 50(16):3807–3823, aug  
714 2005. ISSN 00319155. doi: 10.1088/0031-9155/50/16/010.  
715 URL <http://www.ncbi.nlm.nih.gov/pubmed/16077228>  
716 <http://stacks.iop.org/0031-9155/50/i=16/a=010?key=crossref.c96d66fc4a23aa8>
- 717 [39] Paul L. Nunez. Wavelike Properties of the Alpha Rhythm. *IEEE*  
718 *Transactions on Biomedical Engineering*, BME-21(6):473–482, nov  
719 1974. ISSN 15582531. doi: 10.1109/TBME.1974.324336. URL  
720 <http://ieeexplore.ieee.org/document/4120829/>.
- 721 [40] Richard E. Passingham, Klaas E. Stephan, and Rolf Kötter. The  
722 anatomical basis of functional localization in the cortex, 2002. ISSN  
723 14710048.
- 724 [41] Carlos Perez-Borja, Gian Emilio Chatrian, Francis A. Tyce, and  
725 Morris H. Rivers. Electrographic patterns of the occipital lobe in  
726 man: A topographic study based on use of implanted electrodes.  
727 *Electroencephalography and Clinical Neurophysiology*, 14(2):171–  
728 182, apr 1962. ISSN 00134694. doi: 10.1016/0013-4694(62)90026-3.  
729 URL <http://www.ncbi.nlm.nih.gov/pubmed/14485320>.

- 730 [42] P. A. Robinson, C. J. Rennie, J. J. Wright, H. Bahramali, E. Gor-  
731 don, and D. L. Rowe. Prediction of electroencephalographic spectra  
732 from neurophysiology. *Physical Review E - Statistical, Nonlinear,  
733 and Soft Matter Physics*, 2001. ISSN 15393755. doi: 10.1103/Phys-  
734 RevE.63.021903.
- 735 [43] Dipanjan Roy, Rodrigo Sigala, Michael Breakspear, An-  
736 thony Randal McIntosh, Viktor K. Jirsa, Gustavo Deco,  
737 and Petra Ritter. Using the Virtual Brain to Reveal the  
738 Role of Oscillations and Plasticity in Shaping Brain’s Dy-  
739 namical Landscape. *Brain Connectivity*, 4(10):791–811,  
740 2014. ISSN 2158-0014. doi: 10.1089/brain.2014.0252. URL  
741 <http://online.liebertpub.com/doi/abs/10.1089/brain.2014.0252>.
- 742 [44] Elena Rykhlevskaia, Gabriele Gratton, and Monica Fabiani. Com-  
743 bining structural and functional neuroimaging data for studying  
744 brain connectivity: A review, 2008. ISSN 14698986.
- 745 [45] G. Schmidt, G. Zamora-LÓpez, and J. Kurths. Simulation of  
746 Large Scale Cortical Networks By Individual Neuron Dynamics.  
747 *International Journal of Bifurcation and Chaos*, 20(03):859–867,  
748 2010. ISSN 0218-1274. doi: 10.1142/S0218127410026149. URL  
749 <http://www.worldscientific.com/doi/abs/10.1142/S0218127410026149>.
- 750 [46] Carl W Sem-Jacobsen, Reginald G Bickford, Magnus C Peterson,  
751 and Henry W Dodge Jr. Depth Distribution of Normal Elec-  
752 troencephalographic Rhythms, mar 1953. ISSN 00256196. URL  
753 <http://www.ncbi.nlm.nih.gov/pubmed/13037901>.
- 754 [47] Mario Senden, Niels Reuter, Martijn P. van den Heuvel, Rainer  
755 Goebel, and Gustavo Deco. Cortical rich club regions can orga-  
756 nize state-dependent functional network formation by engaging in  
757 oscillatory behavior. *NeuroImage*, 146(April 2016):561–574, 2017.  
758 ISSN 10959572. doi: 10.1016/j.neuroimage.2016.10.044. URL  
759 <http://dx.doi.org/10.1016/j.neuroimage.2016.10.044>.
- 760 [48] A. Spiegler and V. Jirsa. Systematic approximations of neural  
761 fields through networks of neural masses in the virtual brain.  
762 *NeuroImage*, 83(March):704–725, 2013. ISSN 10538119. doi:  
763 10.1016/j.neuroimage.2013.06.018.

- 764 [49] Andreas Spiegler, Stefan J. Kiebel, Fatihcan M. Atay, and  
765 Thomas R. Knösche. Bifurcation analysis of neural mass  
766 models: Impact of extrinsic inputs and dendritic time  
767 constants. *NeuroImage*, 52(3):1041–1058, 2010. ISSN  
768 10538119. doi: 10.1016/j.neuroimage.2009.12.081. URL  
769 <http://dx.doi.org/10.1016/j.neuroimage.2009.12.081>.
- 770 [50] Andreas Spiegler, Thomas R. Knösche, Karin Schwab, Jens  
771 Haueisen, and Fatihcan M. Atay. Modeling brain resonance phe-  
772 nomena using a neural mass model. *PLoS Computational Biology*,  
773 7(12), 2011. ISSN 1553734X. doi: 10.1371/journal.pcbi.1002298.
- 774 [51] Matthew B. Symond, Anthony W F Harris, Evian Gordon,  
775 and Leanne M. Williams. "Gamma synchrony" in first-  
776 episode schizophrenia: A disorder of temporal connectiv-  
777 ity? *American Journal of Psychiatry*, 162(3):459–465, mar  
778 2005. ISSN 0002953X. doi: 10.1176/appi.ajp.162.3.459. URL  
779 <http://psychiatryonline.org/doi/abs/10.1176/appi.ajp.162.3.459>.
- 780 [52] Francois Tadel, Sylvain Baillet, John C. Mosher, Dimitrios Pantazis,  
781 and Richard M. Leahy. Brainstorm: A user-friendly application for  
782 MEG/EEG analysis. *Computational Intelligence and Neuroscience*,  
783 2011:879716, apr 2011. ISSN 16875265. doi: 10.1155/2011/879716.  
784 URL <http://www.ncbi.nlm.nih.gov/pubmed/21584256>  
785 <http://www.pubmedcentral.nih.gov/articlerender.fcgi?artid=PMC3090754>.
- 786 [53] Peter J Uhlhaas and Wolf Singer. Abnormal neural oscillations  
787 and synchrony in schizophrenia. *Nature Reviews Neuroscience*,  
788 11:100, feb 2010. URL <http://dx.doi.org/10.1038/nrn2774>  
789 <http://10.0.4.14/nrn2774> <https://www.nature.com/articles/nrn2774#supplemen>
- 790 [54] P. A. Valdes, J. C. Jimenez, J. Riera, R. Biscay, and  
791 T. Ozaki. Nonlinear EEG analysis based on a neural  
792 mass model. *Biological Cybernetics*, 81(5-6):415–424, nov  
793 1999. ISSN 03401200. doi: 10.1007/s004220050572. URL  
794 <http://link.springer.com/10.1007/s004220050572>.
- 795 [55] Barry D. Van Veen, Wim Van Drongelen, Moshe Yuchtman,  
796 and Akifumi Suzuki. Localization of brain electrical activ-  
797 ity via linearly constrained minimum variance spatial filter-

- 798 ing. *IEEE Transactions on Biomedical Engineering*, 44(9):867–  
799 880, 1997. ISSN 00189294. doi: 10.1109/10.623056. URL  
800 <http://ieeexplore.ieee.org/document/623056/>.
- 801 [56] H R Wilson and J D Cowan. Excitatory and in-  
802 hibitory interactions in localized populations of model  
803 neurons. *Biophysical journal*, 12(1):1–24, 1972. ISSN  
804 0006-3495. doi: 10.1016/S0006-3495(72)86068-5. URL  
805 <http://www.sciencedirect.com/science/article/pii/S0006349572860685>.
- 806 [57] A. Zalesky, A. Fornito, L. Cocchi, L. L. Gollo, and M. Breaks-  
807 pear. Time-resolved resting-state brain networks. *Proceedings of*  
808 *the National Academy of Sciences*, 2014. ISSN 0027-8424. doi:  
809 10.1073/pnas.1400181111.
- 810 [58] J. Zimmermann, A. Perry, M. Breakspear, M. Schirner, P. Sachdev,  
811 W. Wen, N. A. Kochan, M. Mapstone, P. Ritter, A. R. McIn-  
812 tosh, and A. Solodkin. Differentiation of Alzheimer’s dis-  
813 ease based on local and global parameters in personalized  
814 Virtual Brain models. *NeuroImage: Clinical*, 19:240–251,  
815 2018. ISSN 22131582. doi: 10.1016/j.nicl.2018.04.017. URL  
816 <https://linkinghub.elsevier.com/retrieve/pii/S2213158218301268>.

## 817 6. Supplementary Material

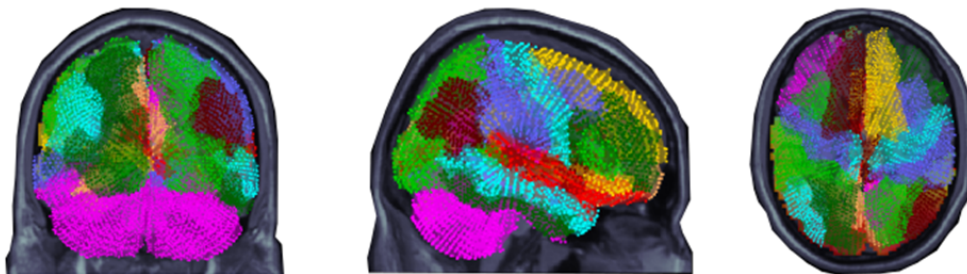

Figure S1: Dots representing volumetric source locations mapped to their respective regions of interest (ROI) viewed from the back, right, and top. Different colors represent the 86 segmented regions in the FreeSurfer Desikan-Killany atlas, each ROI is viewed as a node on the connectome.

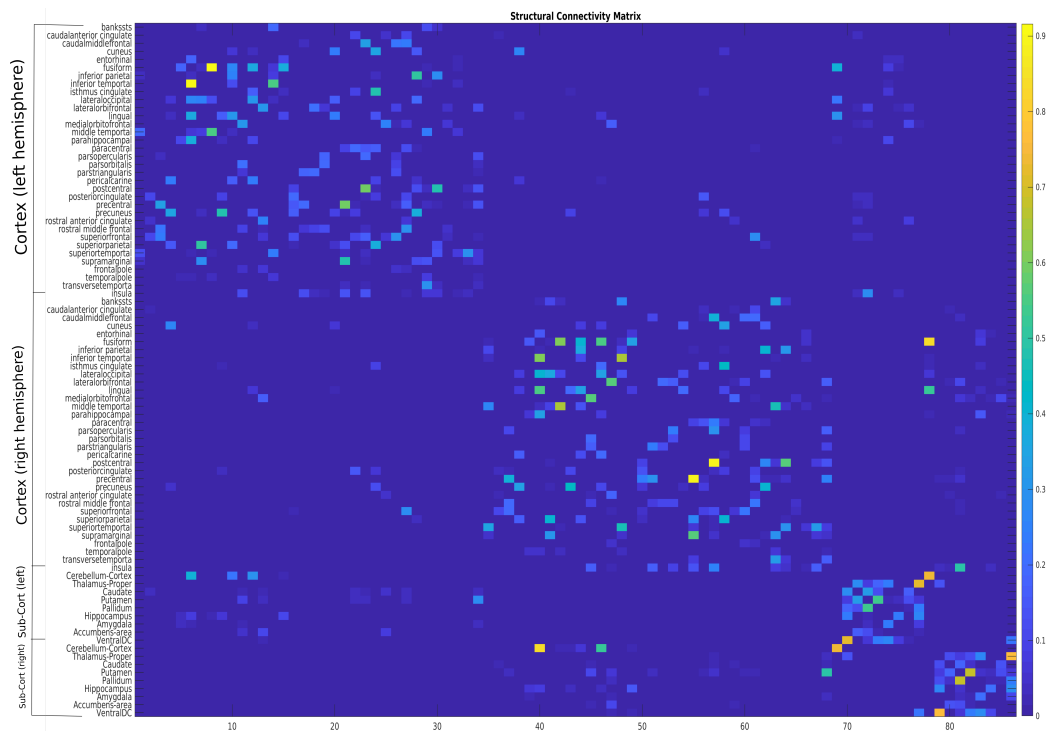

Figure S2: Structural connectivity matrix of one representative subject.

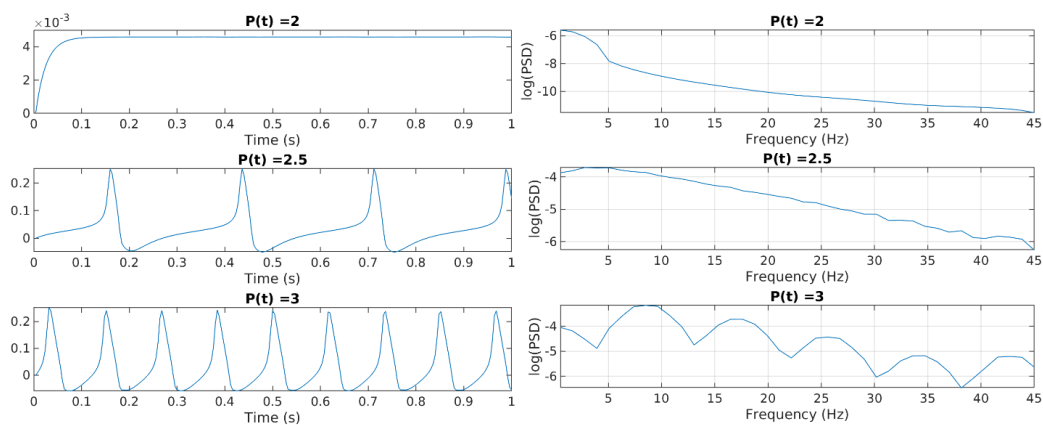

Figure S3: Neural mass model's oscillatory activity changes as external drive parameter  $P(t)$  is gradually increased at one node.



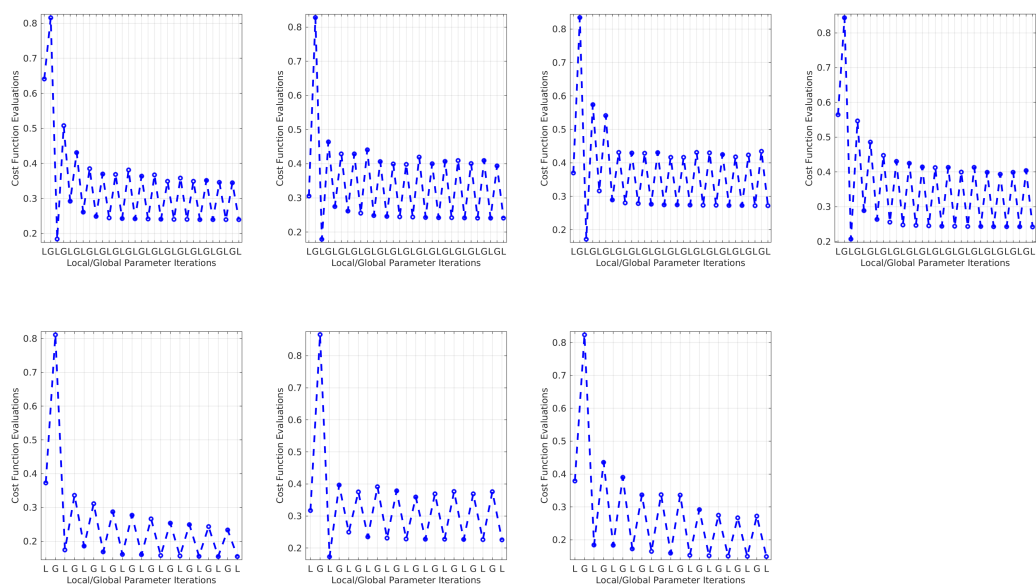

Figure S4: Conditional minimization performance for all subjects.
